# Supplementary material
Source: MDPI journal article supplement (https://www.mdpi.com/2311-7524/8/5/440)

| Species             | Province | Indiv. | Haplotypes (No. of Haplotypes)                                                                                                                               | $H_d$ | $P_i$   | Tajima's $D$ | $P$               | Fu's $F_s$ | $P$        |
|---------------------|----------|--------|--------------------------------------------------------------------------------------------------------------------------------------------------------------|-------|---------|--------------|-------------------|------------|------------|
| <i>Z. bungeanum</i> | Gansu    | 118    | Hap1(91)、Hap2(11)、Hap3(1)、Hap4(7)、<br>Hap5(1)、Hap8(1)、Hap13(3)、Hap19(3)                                                                                      | 0.793 | 0.00053 | -2.43047     | $P < 0.01$        | -13.093    | $P < 0.02$ |
|                     | Sichuan  | 38     | Hap1(33)、Hap2(2)、Hap4(2)、Hap40(1)                                                                                                                            | 0.879 | 0.00053 | -1.6443      | $0.10 > P > 0.05$ | -5.728     | $P < 0.05$ |
|                     | Guizhou  | 9      | Hap1(8)、Hap56(1)                                                                                                                                             | 0.917 | 0.00110 | -0.91732     | $P > 0.10$        | -0.408     | $P > 0.10$ |
|                     | Shaanxi  | 29     | Hap1(26)、Hap58(1)、Hap59(1)、<br>Hap63(1)                                                                                                                      | 0.261 | 0.00086 |              |                   |            |            |
|                     | Shandong | 5      | Hap1(5)                                                                                                                                                      | 0.933 | 0.00148 |              |                   |            |            |
|                     | Shanxi   | 22     | Hap1(19)、Hap65(1)、Hap66(1)、<br>Hap67(1)                                                                                                                      | 0.987 | 0.00094 | -1.30612     | $P > 0.10$        | -16.801    | $P > 0.10$ |
|                     | Yunnan   | 8      | Hap1(8)                                                                                                                                                      | 0.964 | 0.00075 | -0.8664      | $P > 0.10$        | -3.393     | $P > 0.10$ |
|                     | Henan    | 3      | Hap1(3)                                                                                                                                                      | 1.000 | 0.00123 |              |                   |            |            |
|                     | Total    | 232    | Hap1(193)、Hap2(13)、Hap3(1)、<br>Hap4(9)、Hap5(1)、Hap8(1)、Hap13(3)、<br>Hap19(3)、Hap40(1)、Hap56(1)、<br>Hap58(1)、Hap59(1)、Hap63(1)、<br>Hap65(1)、Hap66(1)、Hap67(1) | 0.317 | 0.00033 | -2.74275     | $P < 0.001$       | -10.954    | $P < 0.02$ |
| <i>Z. armatum</i>   | Gansu    | 2      | Hap6(2)<br>Hap6(3)、Hap33(2)、Hap34(6)、<br>Hap35(1)、Hap36(1)、Hap37(1)、                                                                                         | 1.000 | 0.00079 |              |                   |            |            |
|                     | Sichuan  | 33     | Hap38(12)、Hap39(1)、Hap41(1)、<br>Hap42(1)、Hap48(1)、Hap49(1)、<br>Hap50(1)、Hap51(1)                                                                             | 0.860 | 0.00189 | -2.51849     | $P < 0.001$       | -1.318     | $P < 0.02$ |
|                     | Guizhou  | 12     | Hap6(1)、Hap38(7)、Hap54(3)、Hap57(1)                                                                                                                           | 0.939 | 0.00099 | -0.52355     | $P > 0.10$        | -3.153     | $P > 0.10$ |
|                     | Shaanxi  | 3      | Hap60(1)、Hap61(1)、Hap62(1)                                                                                                                                   | 1.000 | 0.01458 |              |                   |            |            |
|                     | Yunnan   | 6      | Hap38(4)、Hap54(1)、Hap68(1)                                                                                                                                   | 1.000 | 0.00123 | -1.1026      | $P > 0.10$        | -2.299     | $P > 0.10$ |

|                     |         |    |                                                                                                                                                                                                                      |       |         |          |           |         |                 |
|---------------------|---------|----|----------------------------------------------------------------------------------------------------------------------------------------------------------------------------------------------------------------------|-------|---------|----------|-----------|---------|-----------------|
| <i>Z. piperitum</i> | Total   | 56 | Hap6(6)、Hap33(2)、Hap34(6)、<br>Hap35(1)、Hap36(1)、Hap37(1)、<br>Hap38(23)、Hap39(1)、Hap41(1)、<br>Hap42(1)、Hap48(1)、Hap49(1)、<br>Hap50(1)、Hap51(1)、Hap54(4)、<br>Hap57(1)、Hap60(1)、Hap61(1)、<br>Hap62(1)、Hap68(1)          | 0.826 | 0.00220 | -2.61538 | P < 0.001 | -1.854  | P < 0.02        |
|                     | Gansu   | 6  | Hap7(5)、Hap9(1)                                                                                                                                                                                                      | 0.933 | 0.00100 | -0.21398 | P > 0.10  | -0.839  | P > 0.10        |
|                     | Sichuan | 21 | Hap9(16)、Hap43(1)、Hap44(1)、<br>Hap45(1)、Hap52(1)、Hap53(1)                                                                                                                                                            | 0.429 | 0.00068 | -1.98555 | P < 0.05  | 0.428   | 0.10 > P > 0.05 |
|                     | Total   | 27 | Hap7(5)、Hap9(17)、Hap43(1)、<br>Hap44(1)、Hap45(1)、Hap52(1)、<br>Hap53(1)                                                                                                                                                | 0.584 | 0.00062 | -2.01059 | P < 0.05  | -0.255  | 0.10 > P > 0.05 |
|                     |         |    | Hap10(3)、Hap11(1)、Hap12(2)、<br>Hap14(1)、Hap15(6)、Hap16(7)、<br>Hap17(2)、Hap18(1)、Hap20(1)、<br>Hap21(1)、Hap22(3)、Hap23(6)、<br>Hap24(1)、Hap25(1)、Hap26(1)、<br>Hap27(1)、Hap28(1)、Hap29(2)、<br>Hap30(1)、Hap31(1)、Hap32(1) |       |         |          |           |         |                 |
| <i>Z. piasezkii</i> | Gansu   | 44 | Hap16(1)、Hap22(4)、Hap46(1)、<br>Hap47(3)                                                                                                                                                                              | 1.000 | 0.00170 | -0.13164 | P > 0.10  | -4.037  | P > 0.10        |
|                     | Sichuan | 9  | Hap10(3)、Hap11(1)、Hap12(2)、<br>Hap14(1)、Hap15(6)、Hap16(8)、<br>Hap17(2)、Hap18(1)、Hap20(1)、<br>Hap21(1)、Hap22(7)、Hap23(6)、                                                                                             | 0.992 | 0.00174 | -0.8448  | P > 0.10  | -42.706 | P > 0.10        |
|                     | Total   | 53 |                                                                                                                                                                                                                      |       |         |          |           |         |                 |

|       |     |                                                                                                                                                                                                                                                                                                                                                                                                                                                                                                                                                                                                                                                                                                                                                                                                                               |       |         |          |           |         |          |
|-------|-----|-------------------------------------------------------------------------------------------------------------------------------------------------------------------------------------------------------------------------------------------------------------------------------------------------------------------------------------------------------------------------------------------------------------------------------------------------------------------------------------------------------------------------------------------------------------------------------------------------------------------------------------------------------------------------------------------------------------------------------------------------------------------------------------------------------------------------------|-------|---------|----------|-----------|---------|----------|
|       |     | Hap24(1)、Hap25(1)、Hap26(1)、<br>Hap27(1)、Hap28(1)、Hap29(2)、<br>Hap30(1)、Hap31(1)、Hap32(1)、<br>Hap46(1)、Hap47(3)<br>Hap1(193)、Hap2(13)、Hap3(1)、<br>Hap4(9)、Hap5(1)、Hap6(6)、Hap7(5)、<br>Hap8(1)、Hap9(17)、Hap10(3)、<br>Hap11(1)、Hap12(2)、Hap13(3)、<br>Hap14(1)、Hap15(6)、Hap16(8)、<br>Hap17(2)、Hap18(1)、Hap19(3)、<br>Hap20(1)、Hap21(1)、Hap22(8)、<br>Hap23(6)、Hap24(1)、Hap25(1)、<br>Hap26(1)、Hap27(1)、Hap28(1)、<br>Hap29(2)、Hap30(1)、Hap31(1)、<br>Hap32(1)、Hap33(2)、Hap34(6)、<br>Hap35(1)、Hap36(1)、Hap37(1)、<br>Hap38(23)、Hap39(1)、Hap40(1)、<br>Hap41(1)、Hap42(1)、Hap43(1)、<br>Hap44(1)、Hap45(1)、Hap46(1)、<br>Hap47(3)、Hap48(1)、Hap49(1)、<br>Hap50(1)、Hap51(1)、Hap52(1)、<br>Hap53(1)、Hap54(4)、Hap55(3)、<br>Hap56(1)、Hap57(1)、Hap58(1)、<br>Hap59(1)、Hap60(1)、Hap61(1)、<br>Hap62(1)、Hap63(1)、Hap64(1)、<br>Hap65(1)、Hap66(1)、Hap67(1)、 |       |         |          |           |         |          |
| Total | 373 |                                                                                                                                                                                                                                                                                                                                                                                                                                                                                                                                                                                                                                                                                                                                                                                                                               | 0.724 | 0.00203 | -2.51347 | P < 0.001 | -30.747 | P < 0.02 |

---

Hap68(1)

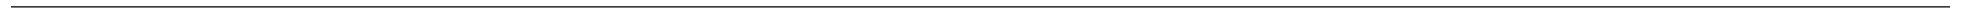

Supplement: s1 [file s1]
