# Supplementary material
Source: MDPI journal article supplement (https://www.mdpi.com/2311-7524/8/5/440)
Supplement: s1 [file s1]

| Code | Cultivar Name           | Location                                      | Species Name        | Type       |
|------|-------------------------|-----------------------------------------------|---------------------|------------|
| GS1  | Tianshuimianjiao1       | Maiji District, Tianshui City, Gansu Province | <i>Z. bungeanum</i> | cultivated |
| GS2  | Tianshuimianjiao2       | Maiji District, Tianshui City, Gansu Province | <i>Z. bungeanum</i> | cultivated |
| GS3  | Tianshuimianjiao3       | Maiji District, Tianshui City, Gansu Province | <i>Z. bungeanum</i> | cultivated |
| GS4  | Tianshuimianjiao4       | Maiji District, Tianshui City, Gansu Province | <i>Z. bungeanum</i> | cultivated |
| GS5  | Tianshuimianjiao5       | Maiji District, Tianshui City, Gansu Province | <i>Z. bungeanum</i> | cultivated |
| GS6  | Tianshuidahongpao1      | Maiji District, Tianshui City, Gansu Province | <i>Z. bungeanum</i> | cultivated |
| GS7  | Tianshuidahongpao2      | Maiji District, Tianshui City, Gansu Province | <i>Z. bungeanum</i> | cultivated |
| GS8  | Tianshuidahongpao3      | Maiji District, Tianshui City, Gansu Province | <i>Z. bungeanum</i> | cultivated |
| GS9  | Tianshuidahongpao4      | Maiji District, Tianshui City, Gansu Province | <i>Z. bungeanum</i> | cultivated |
| GS10 | Tianshuidahongpao5      | Maiji District, Tianshui City, Gansu Province | <i>Z. bungeanum</i> | cultivated |
| GS11 | Baijiao1                | Maiji District, Tianshui City, Gansu Province | <i>Z. bungeanum</i> | cultivated |
| GS12 | Baijiao2                | Maiji District, Tianshui City, Gansu Province | <i>Z. bungeanum</i> | cultivated |
| GS13 | Baijiao3                | Maiji District, Tianshui City, Gansu Province | <i>Z. bungeanum</i> | cultivated |
| GS14 | Qin'anbaijiao1          | Qin'an County, Tianshui City, Gansu Province  | <i>Z. bungeanum</i> | cultivated |
| GS15 | Qin'anbaijiao2          | Qin'an County, Tianshui City, Gansu Province  | <i>Z. bungeanum</i> | cultivated |
| GS16 | Qin'anbaijiao3          | Qin'an County, Tianshui City, Gansu Province  | <i>Z. bungeanum</i> | cultivated |
| GS17 | Qin'anbaijiao4          | Qin'an County, Tianshui City, Gansu Province  | <i>Z. bungeanum</i> | cultivated |
| GS18 | Baijiao1                | Qin'an County, Tianshui City, Gansu Province  | <i>Z. bungeanum</i> | cultivated |
| GS19 | Baijiao2                | Qin'an County, Tianshui City, Gansu Province  | <i>Z. bungeanum</i> | cultivated |
| GS20 | Baijiao3                | Qin'an County, Tianshui City, Gansu Province  | <i>Z. bungeanum</i> | cultivated |
| GS21 | Changbingdahongpao<br>1 | Qin'an County, Tianshui City, Gansu Province  | <i>Z. bungeanum</i> | cultivated |
| GS22 | Changbingdahongpao<br>2 | Qin'an County, Tianshui City, Gansu Province  | <i>Z. bungeanum</i> | cultivated |
| GS23 | Changbingdahongpao      | Qin'an County, Tianshui City, Gansu Province  | <i>Z. bungeanum</i> | cultivated |

|      |                         |                                                |                     |            |
|------|-------------------------|------------------------------------------------|---------------------|------------|
| GS24 | Changbingdahongpao<br>4 | Qin'an County, Tianshui City, Gansu Province   | <i>Z. bungeanum</i> | cultivated |
| GS25 | Qin'andahongpao1        | Qin'an County, Tianshui City, Gansu Province   | <i>Z. bungeanum</i> | cultivated |
| GS26 | Qin'andahongpao2        | Qin'an County, Tianshui City, Gansu Province   | <i>Z. bungeanum</i> | cultivated |
| GS27 | Qin'anyoujiao1          | Qin'an County, Tianshui City, Gansu Province   | <i>Z. bungeanum</i> | cultivated |
| GS28 | Qin'anyoujiao2          | Qin'an County, Tianshui City, Gansu Province   | <i>Z. bungeanum</i> | cultivated |
| GS29 | Qin'anyoujiao3          | Qin'an County, Tianshui City, Gansu Province   | <i>Z. bungeanum</i> | cultivated |
| GS30 | Qin'anyoujiao4          | Qin'an County, Tianshui City, Gansu Province   | <i>Z. bungeanum</i> | cultivated |
| GS31 | Ganguhuajiao1           | Gangu County, Tianshui City, Gansu Province    | <i>Z. bungeanum</i> | cultivated |
| GS32 | Ganguhuajiao2           | Gangu County, Tianshui City, Gansu Province    | <i>Z. bungeanum</i> | cultivated |
| GS33 | Ganguhuajiao3           | Gangu County, Tianshui City, Gansu Province    | <i>Z. bungeanum</i> | cultivated |
| GS34 | Ganguhuajiao4           | Gangu County, Tianshui City, Gansu Province    | <i>Z. bungeanum</i> | cultivated |
| GS35 | Ganguhuajiao5           | Gangu County, Tianshui City, Gansu Province    | <i>Z. bungeanum</i> | cultivated |
| GS36 | Ganguhuajiao6           | Gangu County, Tianshui City, Gansu Province    | <i>Z. bungeanum</i> | cultivated |
| GS37 | Ganguhuajiao7           | Gangu County, Tianshui City, Gansu Province    | <i>Z. bungeanum</i> | cultivated |
| GS38 | Ganguhuajiao8           | Gangu County, Tianshui City, Gansu Province    | <i>Z. bungeanum</i> | cultivated |
| GS39 | Dangchanghuajiao1       | Dangchang County, Longnan City, Gansu Province | <i>Z. bungeanum</i> | cultivated |
| GS40 | Dangchanghuajiao2       | Dangchang County, Longnan City, Gansu Province | <i>Z. bungeanum</i> | cultivated |
| GS41 | Dangchanghuajiao3       | Dangchang County, Longnan City, Gansu Province | <i>Z. bungeanum</i> | cultivated |
| GS42 | Dangchanghuajiao4       | Dangchang County, Longnan City, Gansu Province | <i>Z. bungeanum</i> | cultivated |
| GS43 | Tengjiao                | Wudu District, Longnan City, Gansu Province    | <i>Z. armatum</i>   | cultivated |
| GS44 | Zhuyehujiao             | Wudu District, Longnan City, Gansu Province    | <i>Z. armatum</i>   | cultivated |
| GS45 | Huashanjiao             | Wudu District, Longnan City, Gansu Province    | <i>Z. pipertum</i>  | cultivated |
| GS46 | Putashanjiao            | Wudu District, Longnan City, Gansu Province    | <i>Z. pipertum</i>  | cultivated |
| GS47 | Meihuajiao1             | Wudu District, Longnan City, Gansu Province    | <i>Z. bungeanum</i> | cultivated |

|      |                   |                                             |                     |            |
|------|-------------------|---------------------------------------------|---------------------|------------|
| GS48 | Meihuajiao2       | Wudu District, Longnan City, Gansu Province | <i>Z. bungeanum</i> | cultivated |
| GS49 | Meihuajiao3       | Wudu District, Longnan City, Gansu Province | <i>Z. bungeanum</i> | cultivated |
| GS50 | Meihuajiao4       | Wudu District, Longnan City, Gansu Province | <i>Z. bungeanum</i> | cultivated |
| GS51 | Meihuajiao5       | Wudu District, Longnan City, Gansu Province | <i>Z. bungeanum</i> | cultivated |
| GS52 | Meihuajiao6       | Wudu District, Longnan City, Gansu Province | <i>Z. bungeanum</i> | cultivated |
| GS53 | Meihuajiao7       | Wudu District, Longnan City, Gansu Province | <i>Z. bungeanum</i> | cultivated |
| GS54 | Meihuajiao8       | Wudu District, Longnan City, Gansu Province | <i>Z. bungeanum</i> | cultivated |
| GS55 | Wududahongpao1    | Wudu District, Longnan City, Gansu Province | <i>Z. bungeanum</i> | cultivated |
| GS56 | Wududahongpao2    | Wudu District, Longnan City, Gansu Province | <i>Z. bungeanum</i> | cultivated |
| GS57 | Wududahongpao3    | Wudu District, Longnan City, Gansu Province | <i>Z. bungeanum</i> | cultivated |
| GS58 | Wududahongpao4    | Wudu District, Longnan City, Gansu Province | <i>Z. bungeanum</i> | cultivated |
| GS59 | Wududahongpao5    | Wudu District, Longnan City, Gansu Province | <i>Z. bungeanum</i> | cultivated |
| GS60 | Baishajiao1       | Wudu District, Longnan City, Gansu Province | <i>Z. bungeanum</i> | cultivated |
| GS61 | Baishajiao2       | Wudu District, Longnan City, Gansu Province | <i>Z. bungeanum</i> | cultivated |
| GS62 | Zhaocanghuajiao1  | Wudu District, Longnan City, Gansu Province | <i>Z. pipertum</i>  | cultivated |
| GS63 | Zhaocanghuajiao2  | Wudu District, Longnan City, Gansu Province | <i>Z. pipertum</i>  | cultivated |
| GS64 | Zhaocanghuajiao3  | Wudu District, Longnan City, Gansu Province | <i>Z. pipertum</i>  | cultivated |
| GS65 | Zhaocanghuajiao4  | Wudu District, Longnan City, Gansu Province | <i>Z. pipertum</i>  | cultivated |
| GS66 | Chuanshanhuajiao1 | Wudu District, Longnan City, Gansu Province | <i>Z. piasezkii</i> | wild       |
| GS67 | Chuanshanhuajiao2 | Wudu District, Longnan City, Gansu Province | <i>Z. piasezkii</i> | wild       |
| GS68 | Chuanshanhuajiao3 | Wudu District, Longnan City, Gansu Province | <i>Z. piasezkii</i> | wild       |
| GS69 | Chuanshanhuajiao4 | Wudu District, Longnan City, Gansu Province | <i>Z. piasezkii</i> | wild       |
| GS70 | Chuanshanhuajiao5 | Wudu District, Longnan City, Gansu Province | <i>Z. piasezkii</i> | wild       |
| GS71 | Chuanshanhuajiao6 | Wudu District, Longnan City, Gansu Province | <i>Z. piasezkii</i> | wild       |
| GS72 | Qiyuejiao1        | Wudu District, Longnan City, Gansu Province | <i>Z. bungeanum</i> | cultivated |
| GS73 | Qiyuejiao2        | Wudu District, Longnan City, Gansu Province | <i>Z. bungeanum</i> | cultivated |

|      |            |                                                                     |                     |            |
|------|------------|---------------------------------------------------------------------|---------------------|------------|
| GS74 | Qiyuejiao3 | Wudu District, Longnan City, Gansu Province                         | <i>Z. bungeanum</i> | cultivated |
| GS75 | Bayuejiao1 | Wudu District, Longnan City, Gansu Province                         | <i>Z. bungeanum</i> | cultivated |
| GS76 | Bayuejiao2 | Wudu District, Longnan City, Gansu Province                         | <i>Z. bungeanum</i> | cultivated |
| GS77 | Bayuejiao3 | Wudu District, Longnan City, Gansu Province                         | <i>Z. bungeanum</i> | cultivated |
| GS78 | Bayuejiao4 | Wudu District, Longnan City, Gansu Province                         | <i>Z. bungeanum</i> | cultivated |
| GS79 | Bayuejiao5 | Wudu District, Longnan City, Gansu Province                         | <i>Z. bungeanum</i> | cultivated |
| GS80 | Bayuejiao6 | Zhouqu County, Gannan Tibetan Autonomous Prefecture, Gansu Province | <i>Z. bungeanum</i> | cultivated |
| GS81 | Niujiao1   | Zhouqu County, Gannan Tibetan Autonomous Prefecture, Gansu Province | <i>Z. piasezkii</i> | wild       |
| GS82 | Niujiao2   | Zhouqu County, Gannan Tibetan Autonomous Prefecture, Gansu Province | <i>Z. piasezkii</i> | wild       |
| GS83 | Niujiao3   | Zhouqu County, Gannan Tibetan Autonomous Prefecture, Gansu Province | <i>Z. piasezkii</i> | wild       |
| GS84 | Niujiao4   | Zhouqu County, Gannan Tibetan Autonomous Prefecture, Gansu Province | <i>Z. piasezkii</i> | wild       |
| GS85 | Niujiao5   | Zhouqu County, Gannan Tibetan Autonomous Prefecture, Gansu Province | <i>Z. piasezkii</i> | wild       |
| GS86 | Niujiao6   | Zhouqu County, Gannan Tibetan Autonomous Prefecture, Gansu Province | <i>Z. piasezkii</i> | wild       |
| GS87 | Niujiao7   | Zhouqu County, Gannan Tibetan Autonomous Prefecture, Gansu Province | <i>Z. piasezkii</i> | wild       |
| GS88 | Niujiao8   | Zhouqu County, Gannan Tibetan Autonomous Prefecture, Gansu Province | <i>Z. piasezkii</i> | wild       |
| GS89 | Niujiao9   | Zhouqu County, Gannan Tibetan Autonomous Prefecture, Gansu Province | <i>Z. piasezkii</i> | wild       |
| GS90 | Niujiao10  | Zhouqu County, Gannan Tibetan Autonomous Prefecture, Gansu Province | <i>Z. piasezkii</i> | wild       |
| GS91 | Niujiao11  | Zhouqu County, Gannan Tibetan Autonomous Prefecture, Gansu Province | <i>Z. piasezkii</i> | wild       |
| GS92 | Huajiao1   | Zhouqu County, Gannan Tibetan Autonomous Prefecture, Gansu Province | <i>Z. bungeanum</i> | cultivated |
| GS93 | Huajiao2   | Zhouqu County, Gannan Tibetan Autonomous Prefecture, Gansu Province | <i>Z. bungeanum</i> | cultivated |
| GS94 | Huajiao3   | Zhouqu County, Gannan Tibetan Autonomous Prefecture, Gansu Province | <i>Z. bungeanum</i> | cultivated |
| GS95 | Huajiao4   | Zhouqu County, Gannan Tibetan Autonomous Prefecture, Gansu Province | <i>Z. bungeanum</i> | cultivated |
| GS96 | Huajiao5   | Zhouqu County, Gannan Tibetan Autonomous Prefecture, Gansu Province | <i>Z. bungeanum</i> | cultivated |
| GS97 | Huajiao6   | Zhouqu County, Gannan Tibetan Autonomous Prefecture, Gansu Province | <i>Z. bungeanum</i> | cultivated |
| GS98 | Goujiao1   | Zhouqu County, Gannan Tibetan Autonomous Prefecture, Gansu Province | <i>Z. piasezkii</i> | wild       |
| GS99 | Goujiao2   | Zhouqu County, Gannan Tibetan Autonomous Prefecture, Gansu Province | <i>Z. piasezkii</i> | wild       |

|       |             |                                                                     |                     |            |
|-------|-------------|---------------------------------------------------------------------|---------------------|------------|
| GS100 | Goujiao3    | Zhouqu County, Gannan Tibetan Autonomous Prefecture, Gansu Province | <i>Z. piasezkii</i> | wild       |
| GS101 | Goujiao4    | Zhouqu County, Gannan Tibetan Autonomous Prefecture, Gansu Province | <i>Z. piasezkii</i> | wild       |
| GS102 | Goujiao5    | Zhouqu County, Gannan Tibetan Autonomous Prefecture, Gansu Province | <i>Z. piasezkii</i> | wild       |
| GS103 | Goujiao6    | Zhouqu County, Gannan Tibetan Autonomous Prefecture, Gansu Province | <i>Z. piasezkii</i> | wild       |
| GS104 | Goujiao7    | Zhouqu County, Gannan Tibetan Autonomous Prefecture, Gansu Province | <i>Z. piasezkii</i> | wild       |
| GS105 | Goujiao8    | Zhouqu County, Gannan Tibetan Autonomous Prefecture, Gansu Province | <i>Z. piasezkii</i> | wild       |
| GS106 | Goujiao9    | Zhouqu County, Gannan Tibetan Autonomous Prefecture, Gansu Province | <i>Z. piasezkii</i> | wild       |
| GS107 | Goujiao10   | Zhouqu County, Gannan Tibetan Autonomous Prefecture, Gansu Province | <i>Z. piasezkii</i> | wild       |
| GS108 | Goujiao11   | Zhouqu County, Gannan Tibetan Autonomous Prefecture, Gansu Province | <i>Z. piasezkii</i> | wild       |
| GS109 | Goujiao12   | Zhouqu County, Gannan Tibetan Autonomous Prefecture, Gansu Province | <i>Z. piasezkii</i> | wild       |
| GS110 | Goujiao13   | Zhouqu County, Gannan Tibetan Autonomous Prefecture, Gansu Province | <i>Z. piasezkii</i> | wild       |
| GS111 | Yehuajiao1  | Zhouqu County, Gannan Tibetan Autonomous Prefecture, Gansu Province | <i>Z. piasezkii</i> | wild       |
| GS112 | Yehuajiao2  | Zhouqu County, Gannan Tibetan Autonomous Prefecture, Gansu Province | <i>Z. piasezkii</i> | wild       |
| GS113 | Yehuajiao3  | Zhouqu County, Gannan Tibetan Autonomous Prefecture, Gansu Province | <i>Z. piasezkii</i> | wild       |
| GS114 | Yehuajiao4  | Zhouqu County, Gannan Tibetan Autonomous Prefecture, Gansu Province | <i>Z. piasezkii</i> | wild       |
| GS115 | Yehuajiao5  | Zhouqu County, Gannan Tibetan Autonomous Prefecture, Gansu Province | <i>Z. piasezkii</i> | wild       |
| GS116 | Yehuajiao6  | Zhouqu County, Gannan Tibetan Autonomous Prefecture, Gansu Province | <i>Z. piasezkii</i> | wild       |
| GS117 | Yehuajiao7  | Zhouqu County, Gannan Tibetan Autonomous Prefecture, Gansu Province | <i>Z. piasezkii</i> | wild       |
| GS118 | Yehuajiao8  | Zhouqu County, Gannan Tibetan Autonomous Prefecture, Gansu Province | <i>Z. piasezkii</i> | wild       |
| GS119 | Yehuajiao9  | Zhouqu County, Gannan Tibetan Autonomous Prefecture, Gansu Province | <i>Z. piasezkii</i> | wild       |
| GS120 | Yehuajiao10 | Zhouqu County, Gannan Tibetan Autonomous Prefecture, Gansu Province | <i>Z. piasezkii</i> | wild       |
| GS121 | Yehuajiao11 | Zhouqu County, Gannan Tibetan Autonomous Prefecture, Gansu Province | <i>Z. piasezkii</i> | wild       |
| GS122 | Yehuajiao12 | Zhouqu County, Gannan Tibetan Autonomous Prefecture, Gansu Province | <i>Z. piasezkii</i> | wild       |
| GS123 | Liuyuejiao1 | Zhouqu County, Gannan Tibetan Autonomous Prefecture, Gansu Province | <i>Z. bungeanum</i> | cultivated |
| GS124 | Liuyuejiao2 | Zhouqu County, Gannan Tibetan Autonomous Prefecture, Gansu Province | <i>Z. bungeanum</i> | cultivated |
| GS125 | Liuyuejiao3 | Zhouqu County, Gannan Tibetan Autonomous Prefecture, Gansu Province | <i>Z. bungeanum</i> | cultivated |

|       |              |                                                                     |                     |            |
|-------|--------------|---------------------------------------------------------------------|---------------------|------------|
| GS126 | Liuyuejiao4  | Zhouqu County, Gannan Tibetan Autonomous Prefecture, Gansu Province | <i>Z. bungeanum</i> | cultivated |
| GS127 | Liuyuejiao5  | Zhouqu County, Gannan Tibetan Autonomous Prefecture, Gansu Province | <i>Z. bungeanum</i> | cultivated |
| GS128 | Liuyuejiao6  | Zhouqu County, Gannan Tibetan Autonomous Prefecture, Gansu Province | <i>Z. bungeanum</i> | cultivated |
| GS129 | Liuyuejiao7  | Zhouqu County, Gannan Tibetan Autonomous Prefecture, Gansu Province | <i>Z. bungeanum</i> | cultivated |
| GS130 | Liuyuejiao8  | Zhouqu County, Gannan Tibetan Autonomous Prefecture, Gansu Province | <i>Z. bungeanum</i> | cultivated |
| GS131 | Liuyuejiao9  | Zhouqu County, Gannan Tibetan Autonomous Prefecture, Gansu Province | <i>Z. bungeanum</i> | cultivated |
| GS132 | Liuyuejiao10 | Zhouqu County, Gannan Tibetan Autonomous Prefecture, Gansu Province | <i>Z. bungeanum</i> | cultivated |
| GS133 | Liuyuejiao11 | Zhouqu County, Gannan Tibetan Autonomous Prefecture, Gansu Province | <i>Z. bungeanum</i> | cultivated |
| GS134 | Liuyuejiao12 | Zhouqu County, Gannan Tibetan Autonomous Prefecture, Gansu Province | <i>Z. bungeanum</i> | cultivated |
| GS135 | Liuyuejiao13 | Zhouqu County, Gannan Tibetan Autonomous Prefecture, Gansu Province | <i>Z. bungeanum</i> | cultivated |
| GS136 | Liuyuejiao14 | Zhouqu County, Gannan Tibetan Autonomous Prefecture, Gansu Province | <i>Z. bungeanum</i> | cultivated |
| GS137 | Liuyuejiao15 | Zhouqu County, Gannan Tibetan Autonomous Prefecture, Gansu Province | <i>Z. bungeanum</i> | cultivated |
| GS138 | Liuyuejiao16 | Zhouqu County, Gannan Tibetan Autonomous Prefecture, Gansu Province | <i>Z. bungeanum</i> | cultivated |
| GS139 | Yejiao       | Zhouqu County, Gannan Tibetan Autonomous Prefecture, Gansu Province | <i>Z. piasezkii</i> | wild       |
| GS140 | Yangjiao     | Zhouqu County, Gannan Tibetan Autonomous Prefecture, Gansu Province | <i>Z. piasezkii</i> | wild       |
| GS141 | Bayuejiao1   | Linxia County, Linxia Hui Autonomous Prefecture, Gansu Province     | <i>Z. bungeanum</i> | cultivated |
| GS142 | Bayuejiao2   | Linxia County, Linxia Hui Autonomous Prefecture, Gansu Province     | <i>Z. bungeanum</i> | cultivated |
| GS143 | Bayuejiao3   | Linxia County, Linxia Hui Autonomous Prefecture, Gansu Province     | <i>Z. bungeanum</i> | cultivated |
| GS144 | Bayuejiao4   | Linxia County, Linxia Hui Autonomous Prefecture, Gansu Province     | <i>Z. bungeanum</i> | cultivated |
| GS145 | Bayuejiao5   | Linxia County, Linxia Hui Autonomous Prefecture, Gansu Province     | <i>Z. bungeanum</i> | cultivated |
| GS146 | Cijiao1      | Linxia County, Linxia Hui Autonomous Prefecture, Gansu Province     | <i>Z. bungeanum</i> | cultivated |
| GS147 | Cijiao2      | Linxia County, Linxia Hui Autonomous Prefecture, Gansu Province     | <i>Z. bungeanum</i> | cultivated |
| GS148 | Cijiao3      | Linxia County, Linxia Hui Autonomous Prefecture, Gansu Province     | <i>Z. bungeanum</i> | cultivated |
| GS149 | Cijiao4      | Linxia County, Linxia Hui Autonomous Prefecture, Gansu Province     | <i>Z. bungeanum</i> | cultivated |
| GS150 | Cijiao5      | Linxia County, Linxia Hui Autonomous Prefecture, Gansu Province     | <i>Z. bungeanum</i> | cultivated |
| GS151 | Cijiao6      | Linxia County, Linxia Hui Autonomous Prefecture, Gansu Province     | <i>Z. bungeanum</i> | cultivated |

|       |                  |                                                                   |                     |            |
|-------|------------------|-------------------------------------------------------------------|---------------------|------------|
| GS152 | Cijiao7          | Linxia County, Linxia Hui Autonomous Prefecture, Gansu Province   | <i>Z. bungeanum</i> | cultivated |
| GS153 | Mianjiao1        | Linxia County, Linxia Hui Autonomous Prefecture, Gansu Province   | <i>Z. bungeanum</i> | cultivated |
| GS154 | Mianjiao2        | Linxia County, Linxia Hui Autonomous Prefecture, Gansu Province   | <i>Z. bungeanum</i> | cultivated |
| GS155 | Mianjiao3        | Linxia County, Linxia Hui Autonomous Prefecture, Gansu Province   | <i>Z. bungeanum</i> | cultivated |
| GS156 | Mianjiao4        | Linxia County, Linxia Hui Autonomous Prefecture, Gansu Province   | <i>Z. bungeanum</i> | cultivated |
| GS157 | Mianjiao5        | Yongjing County, Linxia Hui Autonomous Prefecture, Gansu Province | <i>Z. bungeanum</i> | cultivated |
| GS158 | Mianjiao6        | Yongjing County, Linxia Hui Autonomous Prefecture, Gansu Province | <i>Z. bungeanum</i> | cultivated |
| GS159 | Mianjiao7        | Yongjing County, Linxia Hui Autonomous Prefecture, Gansu Province | <i>Z. bungeanum</i> | cultivated |
| GS160 | Mianjiao1        | Yongjing County, Linxia Hui Autonomous Prefecture, Gansu Province | <i>Z. bungeanum</i> | wild       |
| GS161 | Mianjiao2        | Yongjing County, Linxia Hui Autonomous Prefecture, Gansu Province | <i>Z. bungeanum</i> | wild       |
| GS162 | Mianjiao3        | Yongjing County, Linxia Hui Autonomous Prefecture, Gansu Province | <i>Z. bungeanum</i> | wild       |
| GS163 | Cijiao1          | Yongjing County, Linxia Hui Autonomous Prefecture, Gansu Province | <i>Z. bungeanum</i> | wild       |
| GS164 | Cijiao2          | Yongjing County, Linxia Hui Autonomous Prefecture, Gansu Province | <i>Z. bungeanum</i> | wild       |
| GS165 | Cijiao3          | Yongjing County, Linxia Hui Autonomous Prefecture, Gansu Province | <i>Z. bungeanum</i> | wild       |
| GS166 | Cijiao4          | Yongjing County, Linxia Hui Autonomous Prefecture, Gansu Province | <i>Z. bungeanum</i> | wild       |
| GS167 | Cijiao5          | Yongjing County, Linxia Hui Autonomous Prefecture, Gansu Province | <i>Z. bungeanum</i> | wild       |
| GS168 | Cijiao6          | Yongjing County, Linxia Hui Autonomous Prefecture, Gansu Province | <i>Z. bungeanum</i> | wild       |
| GS169 | Cijiao7          | Yongjing County, Linxia Hui Autonomous Prefecture, Gansu Province | <i>Z. bungeanum</i> | wild       |
| GS170 | Cijiao8          | Yongjing County, Linxia Hui Autonomous Prefecture, Gansu Province | <i>Z. bungeanum</i> | wild       |
| SC171 | Zhuyehuajiao1    | Ya'an City, Sichuan Province                                      | <i>Z. armatum</i>   | cultivated |
| SC172 | Zhuyehuajiao2    | Ya'an City, Sichuan Province                                      | <i>Z. armatum</i>   | cultivated |
| SC173 | Zhuyehuajiao3    | Ya'an City, Sichuan Province                                      | <i>Z. armatum</i>   | cultivated |
| SC174 | Zhuyehuajiao1    | Leshan City, Sichuan Province                                     | <i>Z. armatum</i>   | cultivated |
| SC175 | Zhuyehuajiao2    | Leshan City, Sichuan Province                                     | <i>Z. armatum</i>   | cultivated |
| SC176 | Zaoshujiyueqing  | Leshan City, Sichuan Province                                     | <i>Z. armatum</i>   | cultivated |
| SC177 | Zaoshujiyueqing1 | Zizhong County, Neijiang City, Sichuan Province                   | <i>Z. armatum</i>   | cultivated |

|       |                  |                                                 |                     |            |
|-------|------------------|-------------------------------------------------|---------------------|------------|
| SC178 | Zaoshujiyueqing2 | Zizhong County, Neijiang City, Sichuan Province | <i>Z. armatum</i>   | cultivated |
| SC179 | Zaoshujiyueqing3 | Zizhong County, Neijiang City, Sichuan Province | <i>Z. armatum</i>   | cultivated |
| SC180 | Yehuajiao1       | Zizhong County, Neijiang City, Sichuan Province | <i>Z. bungeanum</i> | cultivated |
| SC181 | Yehuajiao2       | Zizhong County, Neijiang City, Sichuan Province | <i>Z. bungeanum</i> | cultivated |
| SC182 | Yehuajiao3       | Zizhong County, Neijiang City, Sichuan Province | <i>Z. bungeanum</i> | cultivated |
| SC183 | Yehuajiao4       | Zizhong County, Neijiang City, Sichuan Province | <i>Z. bungeanum</i> | cultivated |
| SC184 | Yunnanyehuajiao1 | Zizhong County, Neijiang City, Sichuan Province | <i>Z. armatum</i>   | cultivated |
| SC185 | Yunnanyehuajiao2 | Zizhong County, Neijiang City, Sichuan Province | <i>Z. armatum</i>   | cultivated |
| SC186 | Yunnanyehuajiao3 | Zizhong County, Neijiang City, Sichuan Province | <i>Z. armatum</i>   | cultivated |
| SC187 | Yunnanyehuajiao4 | Zizhong County, Neijiang City, Sichuan Province | <i>Z. armatum</i>   | cultivated |
| SC188 | Yunnanyehuajiao5 | Zizhong County, Neijiang City, Sichuan Province | <i>Z. armatum</i>   | cultivated |
| SC189 | Tengjiao1        | Zizhong County, Neijiang City, Sichuan Province | <i>Z. armatum</i>   | cultivated |
| SC190 | Tengjiao2        | Zizhong County, Neijiang City, Sichuan Province | <i>Z. armatum</i>   | cultivated |
| SC191 | Tengjiao3        | Zizhong County, Neijiang City, Sichuan Province | <i>Z. armatum</i>   | cultivated |
| SC192 | Tengjiao4        | Zizhong County, Neijiang City, Sichuan Province | <i>Z. armatum</i>   | cultivated |
| SC193 | Qiyuejiao1       | Zizhong County, Neijiang City, Sichuan Province | <i>Z. bungeanum</i> | cultivated |
| SC194 | Qiyuejiao2       | Zizhong County, Neijiang City, Sichuan Province | <i>Z. bungeanum</i> | cultivated |
| SC195 | Qiyuejiao3       | Zizhong County, Neijiang City, Sichuan Province | <i>Z. bungeanum</i> | cultivated |
| SC196 | Qiyuejiao4       | Zizhong County, Neijiang City, Sichuan Province | <i>Z. bungeanum</i> | cultivated |
| SC197 | Qiyuejiao5       | Zizhong County, Neijiang City, Sichuan Province | <i>Z. bungeanum</i> | cultivated |
| SC198 | Qiyuejiao6       | Zizhong County, Neijiang City, Sichuan Province | <i>Z. bungeanum</i> | cultivated |
| SC199 | Qiyuejiao7       | Zizhong County, Neijiang City, Sichuan Province | <i>Z. bungeanum</i> | cultivated |
| SC200 | Wucihuajiao1     | Zizhong County, Neijiang City, Sichuan Province | <i>Z. pipertum</i>  | cultivated |
| SC201 | Wucihuajiao2     | Zizhong County, Neijiang City, Sichuan Province | <i>Z. pipertum</i>  | cultivated |
| SC202 | Wucihuajiao3     | Zizhong County, Neijiang City, Sichuan Province | <i>Z. pipertum</i>  | cultivated |
| SC203 | Wucihuajiao4     | Zizhong County, Neijiang City, Sichuan Province | <i>Z. pipertum</i>  | cultivated |



|       |                   |                                                                                |                                              |            |
|-------|-------------------|--------------------------------------------------------------------------------|----------------------------------------------|------------|
| SC204 | Damenzhaihuajiao1 | Wenchuan County, Aba Tibetan and Qiang Autonomous Prefecture, Sichuan Province | <i>Z. bungeanum</i>                          | cultivated |
| SC205 | Damenzhaihuajiao2 | Wenchuan County, Aba Tibetan and Qiang Autonomous Prefecture, Sichuan Province | <i>Z. bungeanum</i>                          | cultivated |
| SC206 | Damenzhaihuajiao3 | Wenchuan County, Aba Tibetan and Qiang Autonomous Prefecture, Sichuan Province | <i>Z. bungeanum</i>                          | cultivated |
| SC207 | Damenzhaihuajiao4 | Wenchuan County, Aba Tibetan and Qiang Autonomous Prefecture, Sichuan Province | <i>Z. bungeanum</i>                          | cultivated |
| SC208 | Damenzhaihuajiao5 | Wenchuan County, Aba Tibetan and Qiang Autonomous Prefecture, Sichuan Province | <i>Z. bungeanum</i>                          | cultivated |
| SC209 | Liuyuejiao1       | Wenchuan County, Aba Tibetan and Qiang Autonomous Prefecture, Sichuan Province | <i>Z. bungeanum</i>                          | cultivated |
| SC210 | Liuyuejiao2       | Wenchuan County, Aba Tibetan and Qiang Autonomous Prefecture, Sichuan Province | <i>Z. bungeanum</i>                          | cultivated |
| SC211 | Liuyuejiao1       | Mao County, Aba Tibetan and Qiang Autonomous Prefecture, Sichuan Province      | <i>Z. bungeanum</i>                          | cultivated |
| SC212 | Liuyuejiao2       | Mao County, Aba Tibetan and Qiang Autonomous Prefecture, Sichuan Province      | <i>Z. bungeanum</i>                          | cultivated |
| SC213 | Liuyuejiao        | Heishui, Aba Tibetan and Qiang Autonomous Prefecture, Sichuan Province         | <i>Z. bungeanum</i>                          | cultivated |
| SC214 | Yehuajiao1        | Mao County, Aba Tibetan and Qiang Autonomous Prefecture, Sichuan Province      | <i>Z. piasezkii</i>                          | wild       |
| SC215 | Yehuajiao2        | Mao County, Aba Tibetan and Qiang Autonomous Prefecture, Sichuan Province      | <i>Z. piasezkii</i>                          | wild       |
| SC216 | Yehuajiao3        | Mao County, Aba Tibetan and Qiang Autonomous Prefecture, Sichuan Province      | <i>Z. piasezkii</i>                          | wild       |
| SC217 | Yehuajiao4        | Mao County, Aba Tibetan and Qiang Autonomous Prefecture, Sichuan Province      | <i>Z. piasezkii</i>                          | wild       |
| SC218 | Yehuajiao5        | Mao County, Aba Tibetan and Qiang Autonomous Prefecture, Sichuan Province      | <i>Z. piasezkii</i>                          | wild       |
| SC219 | Maoyehuajiao      | Mao County, Aba Tibetan and Qiang Autonomous Prefecture, Sichuan Province      | <i>Z. bungeanum</i> var.<br><i>pubescens</i> | wild       |
| SC220 | Chuanshanhuajiao1 | Heishui, Aba Tibetan and Qiang Autonomous Prefecture, Sichuan Province         | <i>Z. piasezkii</i>                          | wild       |
| SC221 | Chuanshanhuajiao2 | Heishui, Aba Tibetan and Qiang Autonomous Prefecture, Sichuan Province         | <i>Z. piasezkii</i>                          | wild       |
| SC222 | Chuanshanhuajiao3 | Heishui, Aba Tibetan and Qiang Autonomous Prefecture, Sichuan Province         | <i>Z. piasezkii</i>                          | wild       |
| SC223 | Chuanshanhuajiao4 | Heishui, Aba Tibetan and Qiang Autonomous Prefecture, Sichuan Province         | <i>Z. piasezkii</i>                          | wild       |
| SC224 | Dahongpao1        | Heishui, Aba Tibetan and Qiang Autonomous Prefecture, Sichuan Province         | <i>Z. bungeanum</i>                          | cultivated |
| SC225 | Dahongpao2        | Heishui, Aba Tibetan and Qiang Autonomous Prefecture, Sichuan Province         | <i>Z. bungeanum</i>                          | cultivated |
| SC226 | Dahongpao3        | Heishui, Aba Tibetan and Qiang Autonomous Prefecture, Sichuan Province         | <i>Z. bungeanum</i>                          | cultivated |
| SC227 | Dahongpao4        | Heishui, Aba Tibetan and Qiang Autonomous Prefecture, Sichuan Province         | <i>Z. bungeanum</i>                          | cultivated |
| SC228 | Damujiao1         | Heishui, Aba Tibetan and Qiang Autonomous Prefecture, Sichuan Province         | <i>Z. bungeanum</i>                          | cultivated |

|       |                     |                                                                        |                     |            |
|-------|---------------------|------------------------------------------------------------------------|---------------------|------------|
| SC229 | Damujiao2           | Heishui, Aba Tibetan and Qiang Autonomous Prefecture, Sichuan Province | <i>Z. bungeanum</i> | cultivated |
| SC230 | Qinghuajiao1        | Hanyuan County, Ya'an City, Sichuan Province                           | <i>Z. armatum</i>   | cultivated |
| SC231 | Qinghuajiao2        | Hanyuan County, Ya'an City, Sichuan Province                           | <i>Z. armatum</i>   | cultivated |
| SC232 | Qinghuajiao3        | Hanyuan County, Ya'an City, Sichuan Province                           | <i>Z. armatum</i>   | cultivated |
| SC233 | Jingyangqinghuajiao | Hanyuan County, Ya'an City, Sichuan Province                           | <i>Z. armatum</i>   | cultivated |
| SC234 | Zhenglujiao1        | Hanyuan County, Ya'an City, Sichuan Province                           | <i>Z. bungeanum</i> | cultivated |
| SC235 | Zhenglujiao2        | Hanyuan County, Ya'an City, Sichuan Province                           | <i>Z. bungeanum</i> | cultivated |
| SC236 | Zhenglujiao3        | Hanyuan County, Ya'an City, Sichuan Province                           | <i>Z. bungeanum</i> | cultivated |
| SC237 | Zhenglujiao4        | Hanyuan County, Ya'an City, Sichuan Province                           | <i>Z. bungeanum</i> | cultivated |
| SC238 | Zhenglujiao5        | Hanyuan County, Ya'an City, Sichuan Province                           | <i>Z. bungeanum</i> | cultivated |
| SC239 | Cijiao1             | Hanyuan County, Ya'an City, Sichuan Province                           | <i>Z. bungeanum</i> | cultivated |
| SC240 | Cijiao2             | Hanyuan County, Ya'an City, Sichuan Province                           | <i>Z. bungeanum</i> | cultivated |
| SC241 | Hanyuanhuajiao1     | Hanyuan County, Ya'an City, Sichuan Province                           | <i>Z. bungeanum</i> | cultivated |
| SC242 | Hanyuanhuajiao2     | Hanyuan County, Ya'an City, Sichuan Province                           | <i>Z. bungeanum</i> | cultivated |
| SC243 | Hanyuanhuajiao3     | Hanyuan County, Ya'an City, Sichuan Province                           | <i>Z. bungeanum</i> | cultivated |
| SC244 | Zhuyehuajiao1       | Hanyuan County, Ya'an City, Sichuan Province                           | <i>Z. armatum</i>   | cultivated |
| SC245 | Zhuyehuajiao2       | Hanyuan County, Ya'an City, Sichuan Province                           | <i>Z. armatum</i>   | cultivated |
| SC246 | Yaojiao1            | Hanyuan County, Ya'an City, Sichuan Province                           | <i>Z. armatum</i>   | cultivated |
| SC247 | Yaojiao2            | Hanyuan County, Ya'an City, Sichuan Province                           | <i>Z. armatum</i>   | cultivated |
| SC248 | Hanyuanwanshu       | Hanyuan County, Ya'an City, Sichuan Province                           | <i>Z. bungeanum</i> | cultivated |
| SC249 | Meirenjiao1         | Chongzhou City, Chengdu City, Sichuan Province                         | <i>Z. pipertum</i>  | cultivated |
| SC250 | Meirenjiao2         | Chongzhou City, Chengdu City, Sichuan Province                         | <i>Z. pipertum</i>  | cultivated |
| SC251 | Meirenjiao3         | Chongzhou City, Chengdu City, Sichuan Province                         | <i>Z. pipertum</i>  | cultivated |
| SC252 | Meirenjiao4         | Chongzhou City, Chengdu City, Sichuan Province                         | <i>Z. pipertum</i>  | cultivated |
| SC253 | Zijinjiao1          | Chongzhou City, Chengdu City, Sichuan Province                         | <i>Z. pipertum</i>  | cultivated |
| SC254 | Zijinjiao2          | Chongzhou City, Chengdu City, Sichuan Province                         | <i>Z. pipertum</i>  | cultivated |

|       |                 |                                                                                |                      |            |
|-------|-----------------|--------------------------------------------------------------------------------|----------------------|------------|
| SC255 | Zijinjiao3      | Chongzhou City, Chengdu City, Sichuan Province                                 | <i>Z. pipertum</i>   | cultivated |
| SC256 | Meiguijiao1     | Chongzhou City, Chengdu City, Sichuan Province                                 | <i>Z. pipertum</i>   | cultivated |
| SC257 | Meiguijiao2     | Chongzhou City, Chengdu City, Sichuan Province                                 | <i>Z. pipertum</i>   | cultivated |
| SC258 | Meiguijiao3     | Chongzhou City, Chengdu City, Sichuan Province                                 | <i>Z. pipertum</i>   | cultivated |
| SC259 | Meiguijiao4     | Chongzhou City, Chengdu City, Sichuan Province                                 | <i>Z. pipertum</i>   | cultivated |
| SC260 | Meiguijiao5     | Chongzhou City, Chengdu City, Sichuan Province                                 | <i>Z. pipertum</i>   | cultivated |
| SC261 | Jinlingjiao1    | Chongzhou City, Chengdu City, Sichuan Province                                 | <i>Z. pipertum</i>   | cultivated |
| SC262 | Jinlingjiao2    | Chongzhou City, Chengdu City, Sichuan Province                                 | <i>Z. pipertum</i>   | cultivated |
| SC263 | Jinlingjiao3    | Chongzhou City, Chengdu City, Sichuan Province                                 | <i>Z. pipertum</i>   | cultivated |
| SC264 | Jinlingjiao4    | Chongzhou City, Chengdu City, Sichuan Province                                 | <i>Z. pipertum</i>   | cultivated |
| SC265 | Jinlingjiao5    | Chongzhou City, Chengdu City, Sichuan Province                                 | <i>Z. pipertum</i>   | cultivated |
| SC266 | Shuanglingjiao1 | Chongzhou City, Chengdu City, Sichuan Province                                 | <i>Z. armatum</i>    | cultivated |
| SC267 | Shuanglingjiao2 | Chongzhou City, Chengdu City, Sichuan Province                                 | <i>Z. armatum</i>    | cultivated |
| SC268 | Shuanglingjiao3 | Chongzhou City, Chengdu City, Sichuan Province                                 | <i>Z. armatum</i>    | cultivated |
| SC269 | Tengjiao1       | Hongya County, Meishan City, Sichuan Province                                  | <i>Z. armatum</i>    | cultivated |
| SC270 | Tengjiao2       | Hongya County, Meishan City, Sichuan Province                                  | <i>Z. armatum</i>    | cultivated |
| SC271 | Tengjiao3       | Hongya County, Meishan City, Sichuan Province                                  | <i>Z. armatum</i>    | cultivated |
| SC272 | Tengjiao4       | Hongya County, Meishan City, Sichuan Province                                  | <i>Z. armatum</i>    | cultivated |
| GZ273 | Huajiao1        | Pan County, Liupanshui City, Guizhou Province                                  | <i>Z. bungeanum</i>  | cultivated |
| GZ274 | Huajiao2        | Pan County, Liupanshui City, Guizhou Province                                  | <i>Z. bungeanum</i>  | cultivated |
| GZ275 | Huajiao3        | Pan County, Liupanshui City, Guizhou Province                                  | <i>Z. bungeanum</i>  | cultivated |
| GZ276 | Huajiao4        | Pan County, Liupanshui City, Guizhou Province                                  | <i>Z. bungeanum</i>  | cultivated |
| GZ277 | Zhuyejiao       | Pan County, Liupanshui City, Guizhou Province                                  | <i>Z. armatum</i>    | cultivated |
| GZ278 | Zhuyehuajiao1   | Pan County, Liupanshui City, Guizhou Province                                  | <i>Z. armatum</i>    | wild       |
| GZ279 | Zhuyehuajiao2   | Pan County, Liupanshui City, Guizhou Province                                  | <i>Z. armatum</i>    | wild       |
| GZ280 | Xiaohuahujiao1  | Pu'an County, Qianxinan Buyei and Miao Autonomous Prefecture, Guizhou Province | <i>Z. micranthum</i> | wild       |

|       |                   |                                                                                   |                      |            |
|-------|-------------------|-----------------------------------------------------------------------------------|----------------------|------------|
| GZ281 | Xiaohuahujiao2    | Pu'an County, Qianxinan Buyei and Miao Autonomous Prefecture, Guizhou Province    | <i>Z. micranthum</i> | wild       |
| GZ282 | Xiaohuahujiao3    | Pu'an County, Qianxinan Buyei and Miao Autonomous Prefecture, Guizhou Province    | <i>Z. micranthum</i> | wild       |
| GZ283 | Honghuajiao1      | Pu'an County, Qianxinan Buyei and Miao Autonomous Prefecture, Guizhou Province    | <i>Z. bungeanum</i>  | cultivated |
| GZ284 | Honghuajiao2      | Pu'an County, Qianxinan Buyei and Miao Autonomous Prefecture, Guizhou Province    | <i>Z. bungeanum</i>  | cultivated |
| GZ285 | Honghuajiao3      | Pu'an County, Qianxinan Buyei and Miao Autonomous Prefecture, Guizhou Province    | <i>Z. bungeanum</i>  | cultivated |
| GZ286 | Honghuajiao4      | Pu'an County, Qianxinan Buyei and Miao Autonomous Prefecture, Guizhou Province    | <i>Z. bungeanum</i>  | cultivated |
| GZ287 | Yehuajiao         | Pu'an County, Qianxinan Buyei and Miao Autonomous Prefecture, Guizhou Province    | <i>unknown</i>       | cultivated |
| GZ288 | Dingtanhujiao1    | Zhenfeng County, Qianxinan Buyei and Miao Autonomous Prefecture, Guizhou Province | <i>Z. armatum</i>    | cultivated |
| GZ289 | Dingtanhujiao2    | Zhenfeng County, Qianxinan Buyei and Miao Autonomous Prefecture, Guizhou Province | <i>Z. armatum</i>    | cultivated |
| GZ290 | Dingtanhujiao3    | Zhenfeng County, Qianxinan Buyei and Miao Autonomous Prefecture, Guizhou Province | <i>Z. armatum</i>    | cultivated |
| GZ291 | Dingtanhujiao4    | Zhenfeng County, Qianxinan Buyei and Miao Autonomous Prefecture, Guizhou Province | <i>Z. armatum</i>    | cultivated |
| GZ292 | Jiuyeqinghuajiao1 | Zhenfeng County, Qianxinan Buyei and Miao Autonomous Prefecture, Guizhou Province | <i>Z. armatum</i>    | cultivated |
| GZ293 | Jiuyeqinghuajiao2 | Zhenfeng County, Qianxinan Buyei and Miao Autonomous Prefecture, Guizhou Province | <i>Z. armatum</i>    | cultivated |
| GZ294 | Jiuyeqinghuajiao3 | Zhenfeng County, Qianxinan Buyei and Miao Autonomous Prefecture, Guizhou Province | <i>Z. armatum</i>    | cultivated |
| GZ295 | Jiuyeqinghuajiao4 | Zhenfeng County, Qianxinan Buyei and Miao Autonomous Prefecture, Guizhou Province | <i>Z. armatum</i>    | cultivated |
| GZ296 | Jiuyeqinghuajiao5 | Zhenfeng County, Qianxinan Buyei and Miao Autonomous Prefecture, Guizhou Province | <i>Z. armatum</i>    | cultivated |
| S297  | Choujiao1         | Sangshuping Town, Hancheng City, Shaanxi Province                                 | <i>Z. bungeanum</i>  | cultivated |

|      |                    |                                                   |                     |            |
|------|--------------------|---------------------------------------------------|---------------------|------------|
| S298 | Choujiao2          | Sangshuping Town, Hancheng City, Shaanxi Province | <i>Z. bungeanum</i> | cultivated |
| S299 | Shizitou1          | Sangshuping Town, Hancheng City, Shaanxi Province | <i>Z. bungeanum</i> | cultivated |
| S300 | Shizitou2          | Sangshuping Town, Hancheng City, Shaanxi Province | <i>Z. bungeanum</i> | cultivated |
| S301 | Dahongpao1         | Zhiyang Town, Hancheng City, Shaanxi Province     | <i>Z. bungeanum</i> | cultivated |
| S302 | Dahongpao2         | Zhiyang Town, Hancheng City, Shaanxi Province     | <i>Z. bungeanum</i> | cultivated |
| S303 | Dahongpao3         | Zhiyang Town, Hancheng City, Shaanxi Province     | <i>Z. bungeanum</i> | cultivated |
| S304 | Dahongpao4         | Zhiyang Town, Hancheng City, Shaanxi Province     | <i>Z. bungeanum</i> | cultivated |
| S305 | Dahongpao5         | Zhiyang Town, Hancheng City, Shaanxi Province     | <i>Z. bungeanum</i> | cultivated |
| S306 | Taikongjiao1       | Zhiyang Town, Hancheng City, Shaanxi Province     | <i>Z. bungeanum</i> | cultivated |
| S307 | Taikongjiao2       | Zhiyang Town, Hancheng City, Shaanxi Province     | <i>Z. bungeanum</i> | cultivated |
| S308 | Zhuyehuajiao1      | Feng County, Baoji City, Shaanxi Province         | <i>Z. armatum</i>   | cultivated |
| S309 | Zhuyehuajiao2      | Feng County, Baoji City, Shaanxi Province         | <i>Z. armatum</i>   | cultivated |
| S310 | Zhuyehuajiao3      | Feng County, Baoji City, Shaanxi Province         | <i>Z. armatum</i>   | cultivated |
| S311 | Qiyuejiao1         | Feng County, Baoji City, Shaanxi Province         | <i>Z. bungeanum</i> | cultivated |
| S312 | Qiyuejiao2         | Feng County, Baoji City, Shaanxi Province         | <i>Z. bungeanum</i> | cultivated |
| S313 | Qiyuejiao3         | Feng County, Baoji City, Shaanxi Province         | <i>Z. bungeanum</i> | cultivated |
| S314 | Fengxiandahongpao1 | Feng County, Baoji City, Shaanxi Province         | <i>Z. bungeanum</i> | cultivated |
| S315 | Fengxiandahongpao2 | Feng County, Baoji City, Shaanxi Province         | <i>Z. bungeanum</i> | cultivated |
| S316 | Fengxiandahongpao3 | Feng County, Baoji City, Shaanxi Province         | <i>Z. bungeanum</i> | cultivated |
| S317 | Fengxiandahongpao4 | Feng County, Baoji City, Shaanxi Province         | <i>Z. bungeanum</i> | cultivated |
| S318 | Yehuajiao1         | Feng County, Baoji City, Shaanxi Province         | <i>Z. bungeanum</i> | cultivated |
| S319 | Yehuajiao2         | Feng County, Baoji City, Shaanxi Province         | <i>Z. bungeanum</i> | cultivated |
| S320 | Yehuajiao3         | Feng County, Baoji City, Shaanxi Province         | <i>Z. bungeanum</i> | cultivated |
| S321 | Yehuajiao4         | Feng County, Baoji City, Shaanxi Province         | <i>Z. bungeanum</i> | cultivated |
| S322 | Deguohuajiao1      | Feng County, Baoji City, Shaanxi Province         | <i>Z. bungeanum</i> | cultivated |
| S323 | Deguohuajiao2      | Feng County, Baoji City, Shaanxi Province         | <i>Z. bungeanum</i> | cultivated |

|       |               |                                                    |                     |            |
|-------|---------------|----------------------------------------------------|---------------------|------------|
| S324  | Deguhuajiao3  | Feng County, Baoji City, Shaanxi Province          | <i>Z. bungeanum</i> | cultivated |
| S325  | Fuguhuajiao1  | Fugu County, Yulin City, Shaanxi Province          | <i>Z. bungeanum</i> | cultivated |
| S326  | Fuguhuajiao2  | Fugu County, Yulin City, Shaanxi Province          | <i>Z. bungeanum</i> | cultivated |
| S327  | Fuguhuajiao3  | Fugu County, Yulin City, Shaanxi Province          | <i>Z. bungeanum</i> | cultivated |
| S328  | Fuguhuajiao4  | Fugu County, Yulin City, Shaanxi Province          | <i>Z. bungeanum</i> | cultivated |
| SD329 | Muzhujiao     | Mengyin County, Linyi City, Shandong Province      | <i>Z. bungeanum</i> | cultivated |
| SD330 | Xiaohongjiao  | Mengzhuang Town, Zaozhuang City, Shandong Province | <i>Z. bungeanum</i> | cultivated |
| SD331 | Yehuajiao     | Mengzhuang Town, Zaozhuang City, Shandong Province | <i>Z. piasezkii</i> | wild       |
| SD332 | Xiaohongpao   | Laiwu City, Shandong Province                      | <i>Z. bungeanum</i> | cultivated |
| SD333 | Dahongpao1    | Laiwu City, Shandong Province                      | <i>Z. bungeanum</i> | cultivated |
| SD334 | Dahongpao2    | Laiwu City, Shandong Province                      | <i>Z. bungeanum</i> | cultivated |
| SX335 | Dahongpao     | Wutai County, Xinzhou City, Shanxi Province        | <i>Z. bungeanum</i> | cultivated |
| SX336 | Huajiao1      | Xinfu District, Xinzhou City, Shanxi Province      | <i>Z. bungeanum</i> | cultivated |
| SX337 | Huajiao2      | Xinfu District, Xinzhou City, Shanxi Province      | <i>Z. bungeanum</i> | cultivated |
| SX338 | Huajiao3      | Xinfu District, Xinzhou City, Shanxi Province      | <i>Z. bungeanum</i> | cultivated |
| SX339 | Huajiao1      | Wutai County, Xinzhou City, Shanxi Province        | <i>Z. bungeanum</i> | cultivated |
| SX340 | Huajiao2      | Wutai County, Xinzhou City, Shanxi Province        | <i>Z. bungeanum</i> | cultivated |
| SX341 | Huajiao3      | Wutai County, Xinzhou City, Shanxi Province        | <i>Z. bungeanum</i> | cultivated |
| SX342 | Huajiao4      | Wutai County, Xinzhou City, Shanxi Province        | <i>Z. bungeanum</i> | cultivated |
| SX343 | Huangjinjiao1 | Wutai County, Xinzhou City, Shanxi Province        | <i>Z. bungeanum</i> | cultivated |
| SX344 | Huangjinjiao2 | Wutai County, Xinzhou City, Shanxi Province        | <i>Z. bungeanum</i> | cultivated |
| SX345 | Huangjinjiao3 | Wutai County, Xinzhou City, Shanxi Province        | <i>Z. bungeanum</i> | cultivated |
| SX346 | Huangjinjiao4 | Wutai County, Xinzhou City, Shanxi Province        | <i>Z. bungeanum</i> | cultivated |
| SX347 | Huangjinjiao5 | Wutai County, Xinzhou City, Shanxi Province        | <i>Z. bungeanum</i> | cultivated |
| SX348 | Dahongpao1    | Yu County, Yangquan City, Shanxi Province          | <i>Z. bungeanum</i> | cultivated |
| SX349 | Dahongpao2    | Yu County, Yangquan City, Shanxi Province          | <i>Z. bungeanum</i> | cultivated |

|       |                  |                                                           |                     |            |
|-------|------------------|-----------------------------------------------------------|---------------------|------------|
| SX350 | Huangjinjiao1    | Yu County, Yangquan City, Shanxi Province                 | <i>Z. bungeanum</i> | cultivated |
| SX351 | Huangjinjiao2    | Yu County, Yangquan City, Shanxi Province                 | <i>Z. bungeanum</i> | cultivated |
| SX352 | Huangjinjiao3    | Yu County, Yangquan City, Shanxi Province                 | <i>Z. bungeanum</i> | cultivated |
| SX353 | Huajiao1         | Yu County, Yangquan City, Shanxi Province                 | <i>Z. bungeanum</i> | cultivated |
| SX354 | Huajiao2         | Yu County, Yangquan City, Shanxi Province                 | <i>Z. bungeanum</i> | cultivated |
| SX355 | Huajiao3         | Yu County, Yangquan City, Shanxi Province                 | <i>Z. bungeanum</i> | cultivated |
| SX356 | Huajiao4         | Yu County, Yangquan City, Shanxi Province                 | <i>Z. bungeanum</i> | cultivated |
| YN357 | Qiyeqinghuajiao1 | Yunnan Academy of forestry, Kunming City, Yunnan Province | <i>Z. armatum</i>   | cultivated |
| YN358 | Qiyeqinghuajiao2 | Yunnan Academy of forestry, Kunming City, Yunnan Province | <i>Z. armatum</i>   | cultivated |
| YN359 | Qiyeqinghuajiao3 | Yunnan Academy of forestry, Kunming City, Yunnan Province | <i>Z. armatum</i>   | cultivated |
| YN360 | Qinghuajiao      | Yunnan Academy of forestry, Kunming City, Yunnan Province | <i>Z. armatum</i>   | cultivated |
| YN361 | Donghuajiao      | Xishan District, Kunming City, Yunnan Province            | <i>Z. armatum</i>   | cultivated |
| YN362 | Zhuyejiao        | Xishan District, Kunming City, Yunnan Province            | <i>Z. armatum</i>   | cultivated |
| YN363 | Huajiao          | Xishan District, Kunming City, Yunnan Province            | <i>Z. bungeanum</i> | cultivated |
| YN364 | Huajiao1         | Qinglong Town, Yuxi City, Yunnan Province                 | <i>Z. bungeanum</i> | cultivated |
| YN365 | Huajiao2         | Qinglong Town, Yuxi City, Yunnan Province                 | <i>Z. bungeanum</i> | cultivated |
| YN366 | Huajiao3         | Qinglong Town, Yuxi City, Yunnan Province                 | <i>Z. bungeanum</i> | cultivated |
| YN367 | Yehuajiao1       | Qinglong Town, Yuxi City, Yunnan Province                 | <i>Z. bungeanum</i> | cultivated |
| YN368 | Yehuajiao2       | Qinglong Town, Yuxi City, Yunnan Province                 | <i>Z. bungeanum</i> | cultivated |
| YN369 | Yehuajiao3       | Qinglong Town, Yuxi City, Yunnan Province                 | <i>Z. bungeanum</i> | cultivated |
| YN370 | Yehuajiao4       | Qinglong Town, Yuxi City, Yunnan Province                 | <i>Z. bungeanum</i> | cultivated |
| HN371 | Dahongpao1       | Mianchi County, Sanmenxia City, Henan Province            | <i>Z. bungeanum</i> | cultivated |
| HN372 | Dahongpao2       | Mianchi County, Sanmenxia City, Henan Province            | <i>Z. bungeanum</i> | cultivated |
| HN373 | Dahongpao3       | Mianchi County, Sanmenxia City, Henan Province            | <i>Z. bungeanum</i> | cultivated |
